# Supplementary material for: A decade of arbovirus emergence in the temperate southern cone of South America: dengue, Aedes aegypti and climate dynamics in Córdoba, Argentina
Source: bioRxiv or medRxiv preprint supplement (doi:10.1101/2020.01.16.908814), 2020-07-14

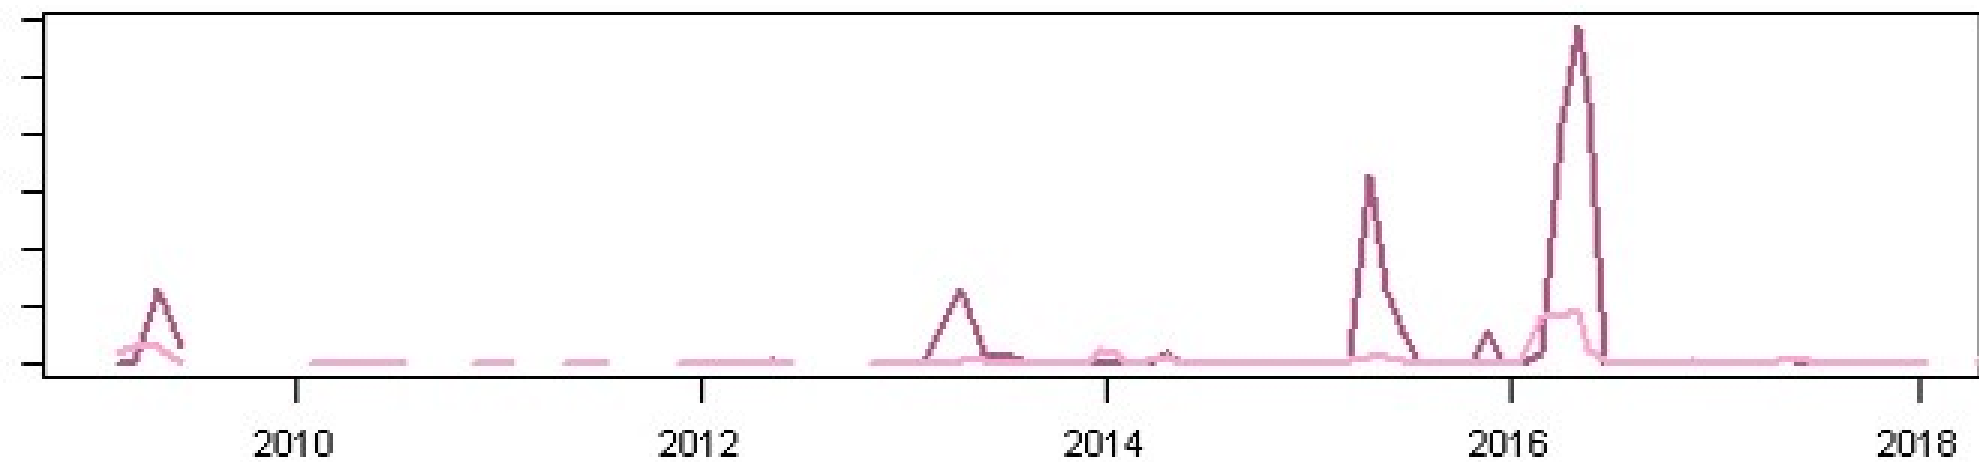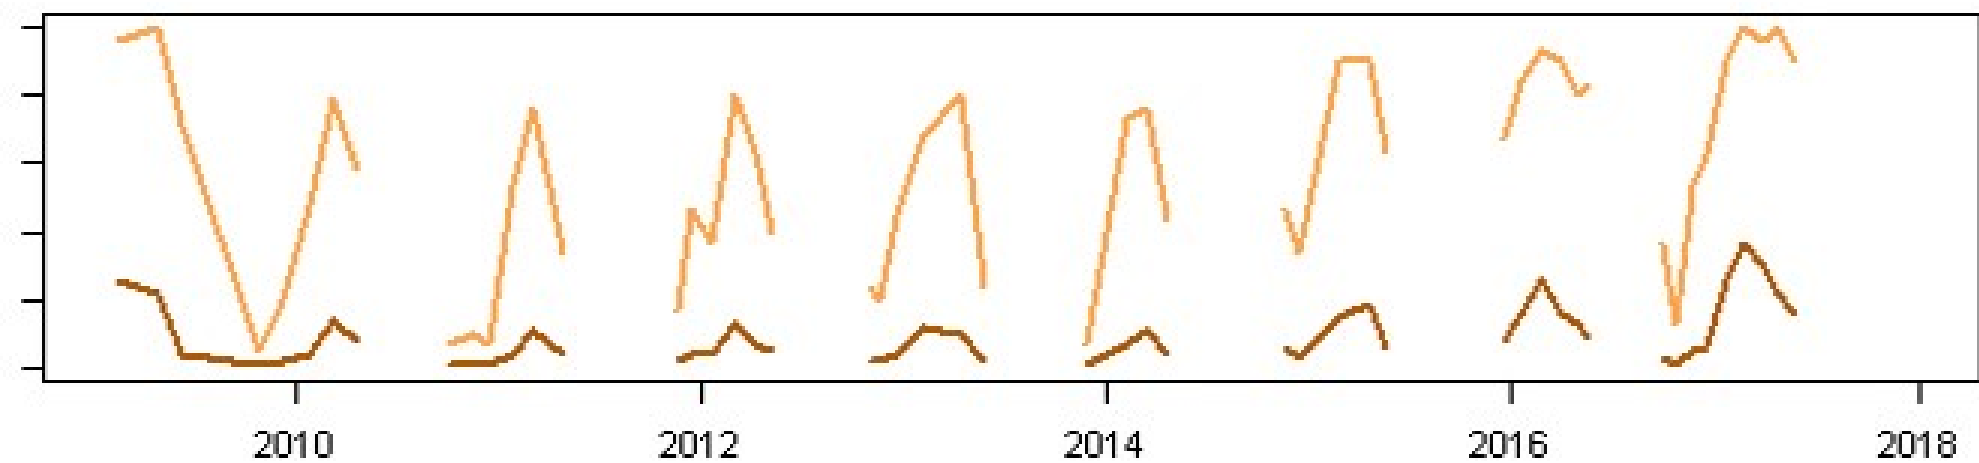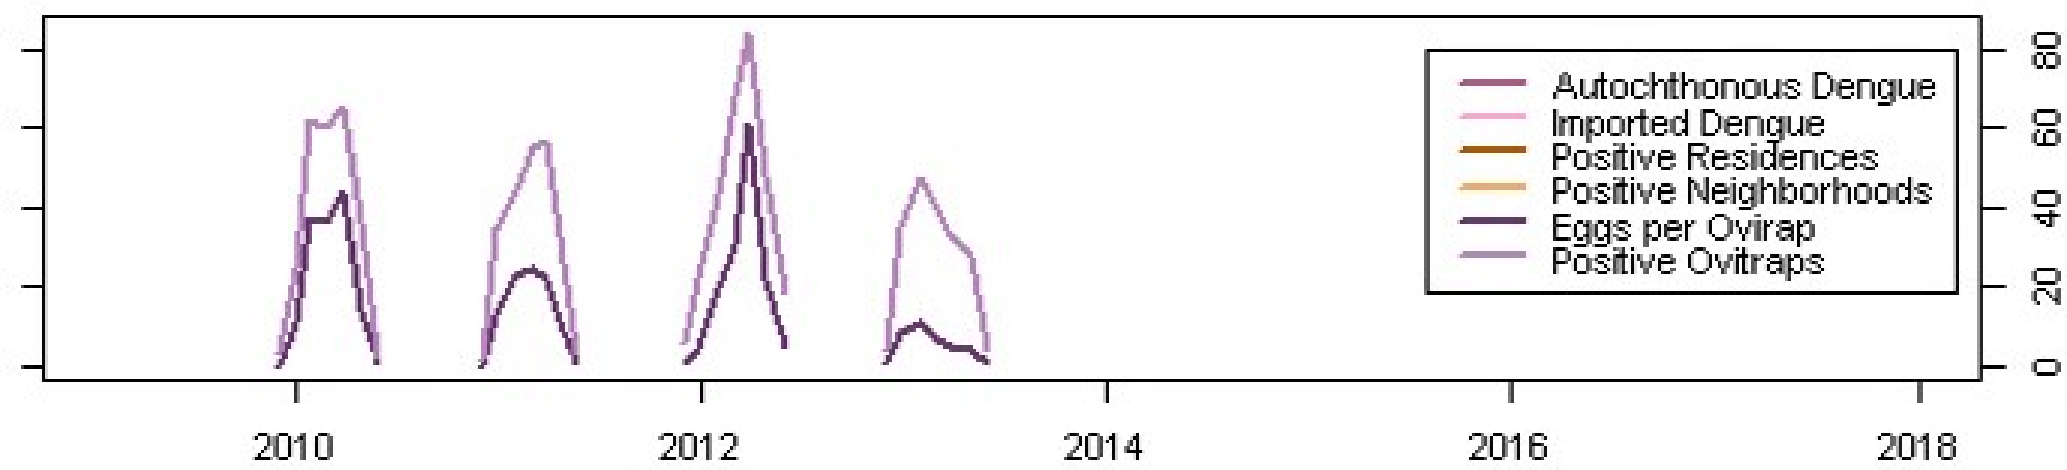

Supplement: Supplementary file [file media-1.pdf]
